# Supplementary material
Source: bioRxiv or medRxiv preprint supplement (https://www.biorxiv.org/highwire/filestream/123140/field_highwire_adjunct_files/2/358622-3.pdf)

### A Cortical organoid plated on MEA plate

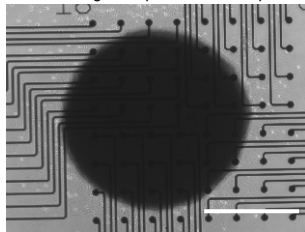

### B criteria definition of MEA parameter

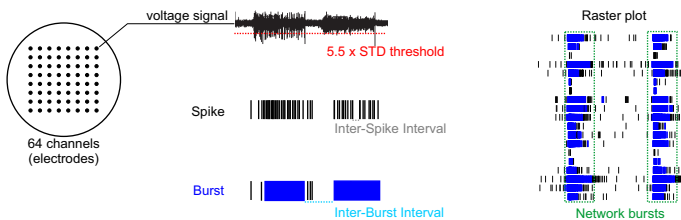

### C

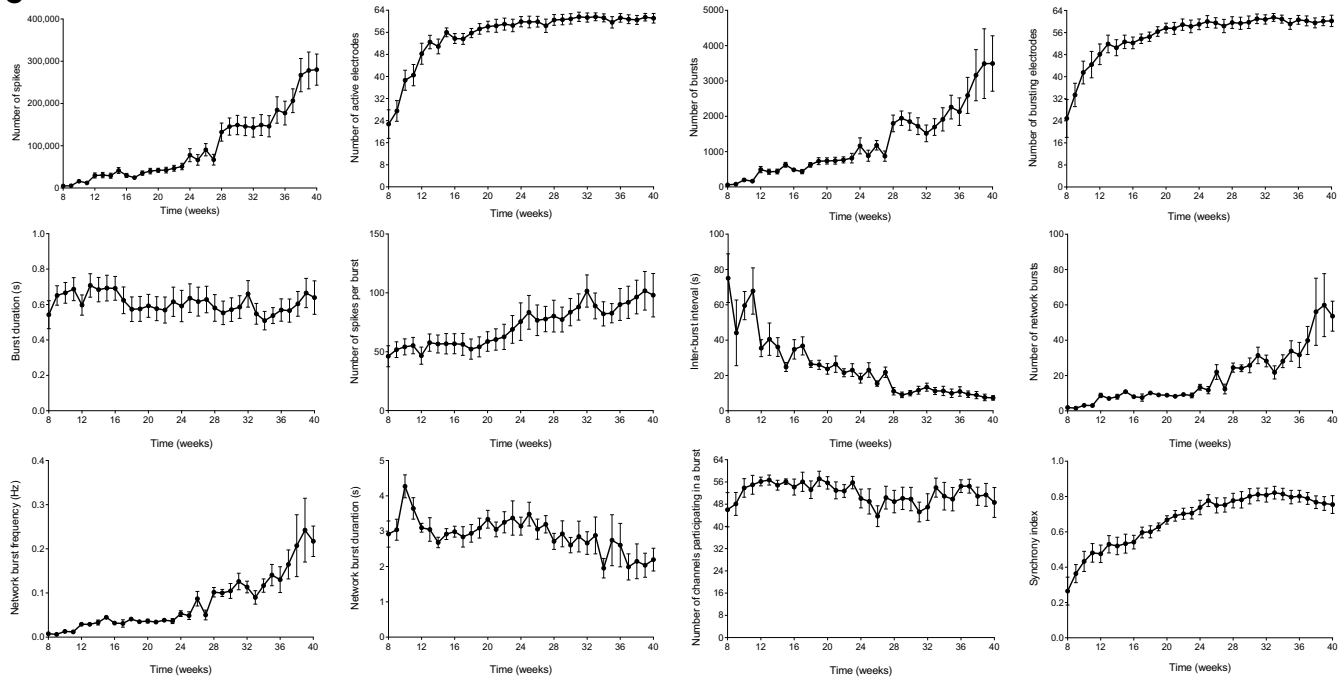

### D

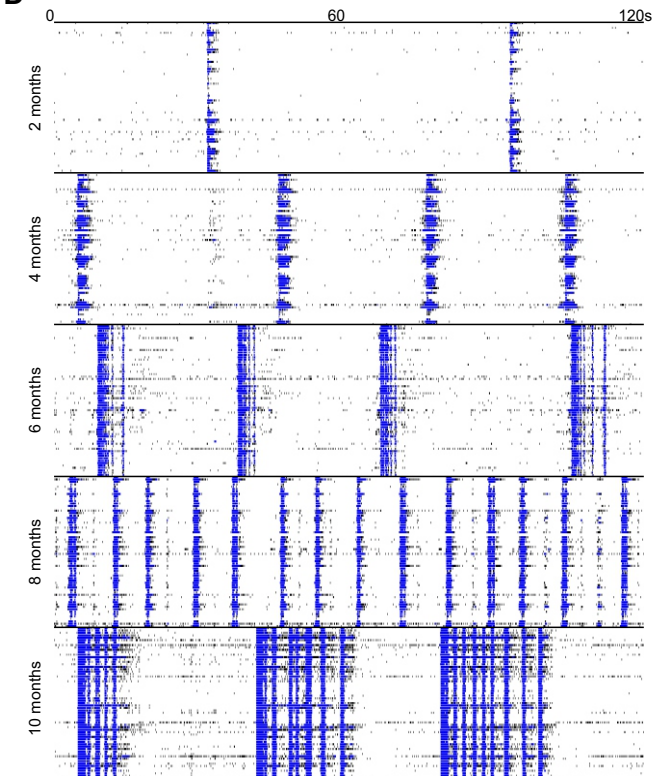

### E

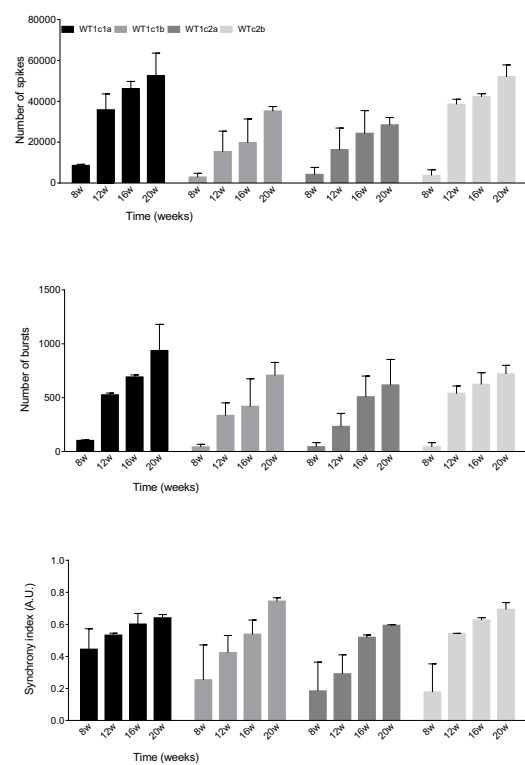

Supplement: Supplementary file [file 358622-3.pdf]
